# Supplementary figures and images for: Domesticated Populations of Codium tomentosum Display Lipid Extracts with Lower Seasonal Shifts than Conspecifics from the Wild—Relevance for Biotechnological Applications of this Green Seaweed
Source: MDPI journal article supplement (doi:10.3390/md18040188), 2020-03-31

a.

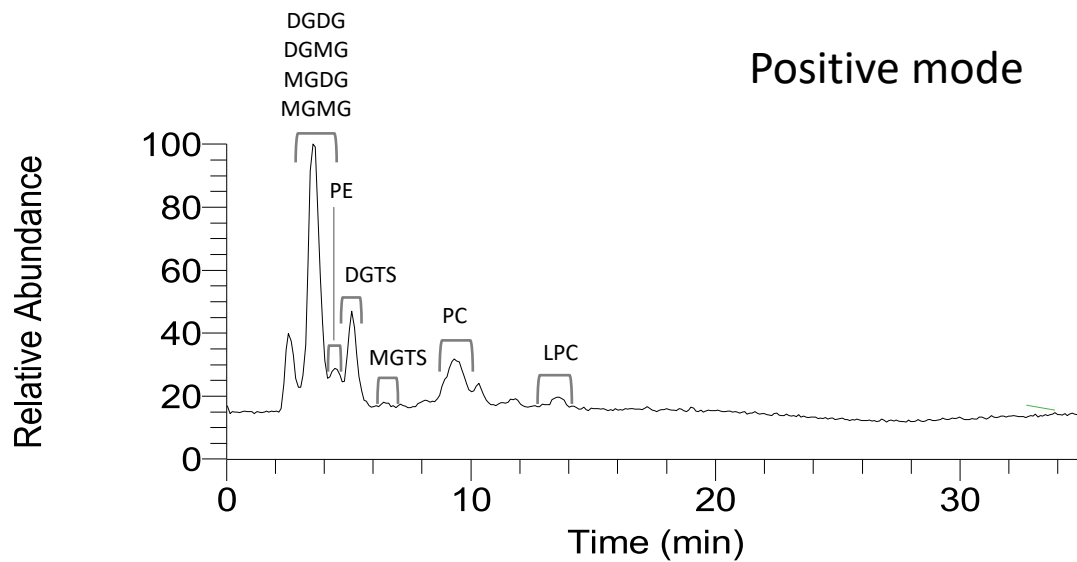

b.

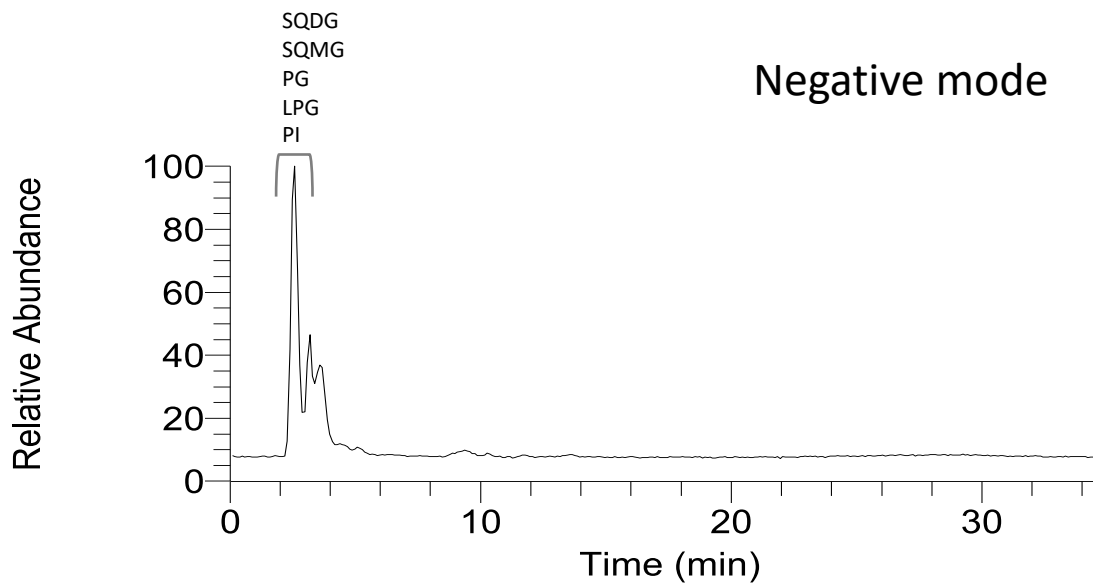

Supplement: s1 [file s1]

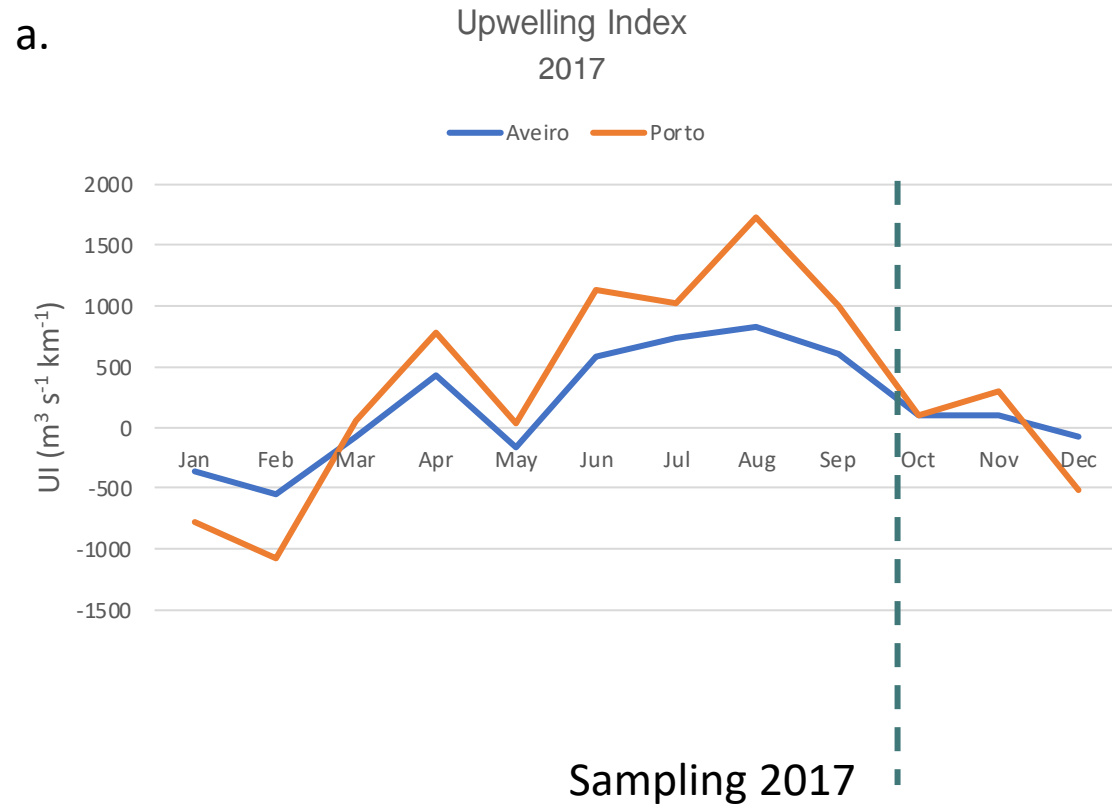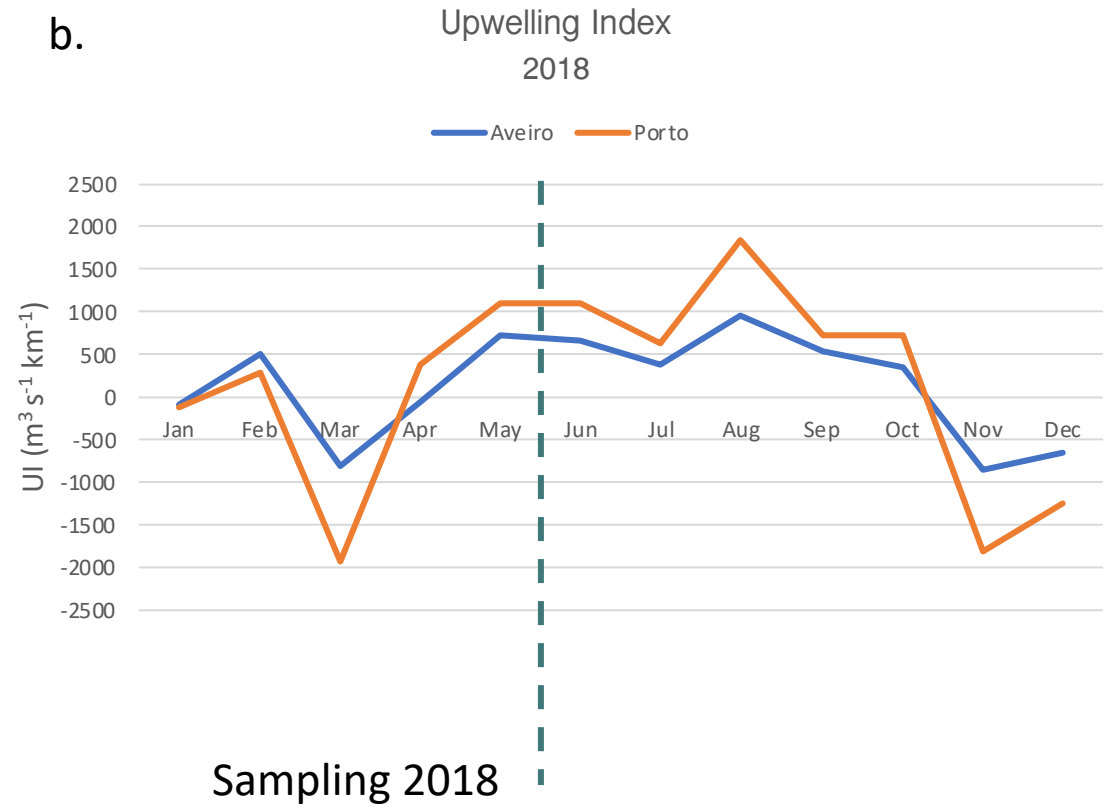

Supplement: s1 [file s1]
